# Supplementary material for: Cost of introducing and delivering malaria vaccine (RTS,S/AS01E) in areas of seasonal malaria transmission, Mali and Burkina Faso
Source: HighWire-hosted journal article supplement (doi:10.1136/bmjgh-2022-011316), 2023-04-01

## Appendices

**Appendix Table 1.a: List of sub-activities by cost category and activity occurrence frequency in Mali**

| Activities                                                                                   | Scenario 1: Mass campaign | Scenario 2: Routine EPI                 | Scenario 3: Mixed delivery                                                          |
|----------------------------------------------------------------------------------------------|---------------------------|-----------------------------------------|-------------------------------------------------------------------------------------|
| <b>Vaccine and injection supplies procurement</b>                                            |                           |                                         |                                                                                     |
| Procurement of vaccine                                                                       | Each year                 | Each year                               | Each year                                                                           |
| Procurement of supplies- 2ml syringe                                                         | Each year                 | Each year                               | Each year                                                                           |
| Procurement of supplies- RUP syringe                                                         | Each year                 | Each year                               | Each year                                                                           |
| Procurement of supplies- Safety boxes                                                        | Each year                 | Each year                               | Each year                                                                           |
| <b>Distribution</b>                                                                          |                           |                                         |                                                                                     |
| Receive vaccine and supplies at the national store                                           | Three times each year     | Quarterly (4 times) a year, shared cost | Quarterly (4 times) a year, shared cost, plus one time for campaign starting year 2 |
| Distribution of vaccine and supplies from national store to regional (up to district) stores | Three times each year     | Quarterly (4 times) a year, shared cost | Quarterly (4 times) a year, shared cost, plus one time for campaign starting year 2 |
| Collection of vaccine and supplies from regional store by District stores                    | NA                        | Monthly, shared cost                    | Monthly, shared cost                                                                |
| Distribution of vaccine and supplies from district store to health facilities                | Three times each year     | NA                                      | One time each year                                                                  |
| Collection of vaccine and supplies from district store by health facilities                  | NA                        | Monthly, shared cost                    | Monthly, shared cost                                                                |
| <b>Planning and coordination</b>                                                             |                           |                                         |                                                                                     |
| Planning for introduction at National level                                                  | Once in year 1 only       | Once in year 1 only                     | Once in years 1 and 2 only                                                          |
| Develop plans for introduction/campaign                                                      | Once in year 1 only       | Once in year 1 only                     | Once in years 1 and 2 only                                                          |
| National level macroplanning for introduction/campaign                                       | Once each year            | Once in year 1 only                     | Once each year                                                                      |
| Regional level microplanning for introduction/campaign                                       | Once each year            | Once in year 1 only                     | Once each year                                                                      |
| District level microplanning for introduction/campaign                                       | Once each year            | Once in year 1 only                     | Once each year                                                                      |
| Health facility level microplanning for introduction/campaign                                | Once each year            | Once in year 1 only                     | Once each year                                                                      |
| <b>Training</b>                                                                              |                           |                                         |                                                                                     |
| Develop training materials and tools and TOT at national level                               | Once in year 1 only       | Once in year 1 only                     | Once in year 1 only                                                                 |

| Activities                                                                               | Scenario 1: Mass campaign                                                           | Scenario 2: Routine EPI                   | Scenario 3: Mixed delivery                                                          |
|------------------------------------------------------------------------------------------|-------------------------------------------------------------------------------------|-------------------------------------------|-------------------------------------------------------------------------------------|
| Refresher Training of trainers for the national level staff                              | Once each year from year 2                                                          | NA                                        | Once each year from year 2                                                          |
| Training for the regional level staff                                                    | Once in year 1 only                                                                 | Once in year 1 only                       | Once in year 1 only                                                                 |
| Refresher training at regional level                                                     | Once each year from year 2                                                          | NA                                        | Once each year from year 2                                                          |
| Training for the district level staff                                                    | Once in year 1 only                                                                 | Once in year 1 only                       | Once in year 1 only                                                                 |
| Refresher training for the district level staff                                          | Once each year from year 2                                                          | NA                                        | Once each year from year 2                                                          |
| Training for the health facility staff                                                   | Once in year 1 only                                                                 | Once in year 1 only                       | Once in year 1 only                                                                 |
| Refresher training for the health facility staff                                         | Once each year from year 2                                                          | NA                                        | Once each year from year 2                                                          |
| Training of community health workers                                                     | Once each year                                                                      | Year 1 only                               | Once each year                                                                      |
| <b>Communication (IEC)</b>                                                               |                                                                                     |                                           |                                                                                     |
| Production of communication materials (Sketch, spot, trailers)                           | Once in year 1 only                                                                 | Once in year 1 only                       | Once in year 1 only                                                                 |
| Broadcasting of communication material in National level (TV/Radio)                      | Each year                                                                           | Year 1 only                               | Each year                                                                           |
| Printing of IEC materials                                                                | Once in year 1 only                                                                 | Once in year 1 only                       | Once in year 1 only                                                                 |
| Broadcasting of communication material in local (district) level (TV/Radio)              | Each year                                                                           | Year 1 only                               | Each year                                                                           |
| <b>Social mobilization</b>                                                               |                                                                                     |                                           |                                                                                     |
| Organize press conference for introduction                                               | Once in year 1 only                                                                 | Once in year 1 only                       | Once in year 1 only                                                                 |
| National level campaign launch                                                           | Once each year. Full cost for first 2 years, campaign scale halved for other years. | Once in year 1 only                       | Once each year. Full cost for first 2 years, campaign scale halved for other years. |
| Coordination and preparation of community information session by Social Development Unit | Once each year                                                                      | Once in year 1 only                       | Once each year                                                                      |
| Hold information sharing/launch session in district                                      | Each year                                                                           | Years 1 and 2 only                        | Each year                                                                           |
| Community sensitization/mobilization by community health volunteers                      | Each year                                                                           | Years 1 and 2 only                        | Each year                                                                           |
| <b>Monitoring and evaluation</b>                                                         |                                                                                     |                                           |                                                                                     |
| Post introduction/campaign evaluation                                                    | Year 1 only                                                                         | Year 1 only                               | Year 1 only                                                                         |
| <b>Supervision</b>                                                                       |                                                                                     |                                           |                                                                                     |
| Introduction supervision by a team of national, regional and district staff              | Three times each year                                                               | Two times each year in years 1 and 2 only | Two times each year                                                                 |

| Activities                                                                       | Scenario 1: Mass campaign             | Scenario 2: Routine EPI                    | Scenario 3: Mixed delivery                 |
|----------------------------------------------------------------------------------|---------------------------------------|--------------------------------------------|--------------------------------------------|
| Introduction supervision by health facility staff                                | Three times each year                 | Two times each year in years 1 and 2 only  | Two times each year                        |
| Routine quarterly supervision by a team of national, regional and district staff | NA                                    | Quarterly (4 times) each year, shared cost | Quarterly (4 times) each year, shared cost |
| Routine quarterly supervision by regional level staff                            | NA                                    | Quarterly (4 times) each year, shared cost | Quarterly (4 times) each year, shared cost |
| Routine quarterly supervision by district level staff                            | NA                                    | Quarterly (4 times) each year, shared cost | Quarterly (4 times) each year, shared cost |
| <b>Service delivery</b>                                                          |                                       |                                            |                                            |
| Vaccination administration through routine EPI clinic                            | NA                                    | Each year                                  | Each year                                  |
| Vaccination administration through routine EPI outreach                          | NA                                    | Each year                                  | Each year                                  |
| Vaccination administration during seasonal campaign                              | Three times each year                 | NA                                         | One time each year starting year 2         |
| <b>Cold chain procurement</b>                                                    |                                       |                                            |                                            |
| Cold room walk in (capacity: 30 cu m) added at national level                    | Years 1, 3, and 5                     | Years 1, 3, and 5                          | Years 1, 3, and 5                          |
| Cold room walk in (capacity: 10 cu m) added to 11 regional levels                | Years 1, and 3                        | Years 1, and 3                             | Years 1, and 3                             |
| Refrigerators (capacity: 145,000 cu cm) added to 75 district levels              | Years 1, and 3                        | Years 1, and 3                             | Years 1, and 3                             |
| Cold boxes added to each health facility (5 cold boxes per health facility)      | Years 1, and 3                        | Years 1, and 3                             | Years 1, and 3                             |
| Maintenance of cold chain                                                        | Each year, shared cost                | Each year, shared cost                     | Each year, shared cost                     |
| <b>Other capital equipment purchase</b>                                          |                                       |                                            |                                            |
| Vehicles for national level to support implementation                            | 8 vehicles in year 1                  | 8 vehicles in year 1                       | 8 vehicles in year 1                       |
| Vehicles for regional level to support implementation                            | 2 per implementing region in year 1   | 2 per implementing region in year 1        | 2 per implementing region in year 1        |
| Vehicles for district level to support implementation                            | 2 per implementing district in year 1 | 2 per implementing district in year 1      | 2 per implementing district in year 1      |

**Appendix Table 1.b: List of sub-activities by cost category and activity occurrence frequency in Burkina Faso**

| Activities                                                                        | Scenario 1: Campaign        | Scenario 2: Routine EPI                  | Scenario 3: Mixed delivery                                                          |
|-----------------------------------------------------------------------------------|-----------------------------|------------------------------------------|-------------------------------------------------------------------------------------|
| <b>Vaccine and injection supplies procurement</b>                                 |                             |                                          |                                                                                     |
| Procurement of vaccine                                                            | Each year                   | Each year                                | Each year                                                                           |
| Procurement of supplies- 2ml syringe                                              | Each year                   | Each year                                | Each year                                                                           |
| Procurement of supplies- RUP syringe                                              | Each year                   | Each year                                | Each year                                                                           |
| Procurement of supplies- Safety boxes                                             | Each year                   | Each year                                | Each year                                                                           |
| <b>Distribution</b>                                                               |                             |                                          |                                                                                     |
| Receive vaccine and supplies at the national store                                | Three times each year       | Quarterly (4 times) a year, shared cost  | Quarterly (4 times) a year, shared cost, plus one time for campaign starting year 2 |
| Distribution of vaccine and supplies from national store to regional stores       | Three times each year       | Quarterly (4 times) a year, shared cost  | Quarterly (4 times) a year, shared cost, plus one time for campaign starting year 2 |
| Collection of vaccine and supplies from regional store by District stores         | Three times each year       | Bi-monthly (6 times) a year, shared cost | Bi-monthly (6 times) a year, shared cost                                            |
| Distribution of vaccine and supplies from district store to health facilities     | Three times each year       | NA                                       | One time each year starting year 2                                                  |
| Collection of vaccine and supplies from district store by health facilities       | NA                          | Bi-monthly (6 times) a year, shared cost | Bi-monthly (6 times) a year, shared cost                                            |
| <b>Planning and coordination</b>                                                  |                             |                                          |                                                                                     |
| Develop plans for introduction/campaign                                           | Three events in year 1 only | Three events in year 1 only              | Three events in year 1 only                                                         |
| Planning for introduction at national level for campaign                          | Once each year              | NA                                       | Once each year starting year 2                                                      |
| Regional level microplanning for introduction/campaign                            | Once each year              | Once in year 1 only                      | Once each year                                                                      |
| District level microplanning for introduction/campaign                            | Once each year              | Once in year 1 only                      | Once each year                                                                      |
| Health facility level microplanning for introduction/campaign                     | Once each year              | Once in year 1 only                      | Once each year                                                                      |
| Routine microplanning at national, regional, district, and health facility levels | NA                          | Once each year, shared cost              | Once each year, shared cost                                                         |
| <b>Training</b>                                                                   |                             |                                          |                                                                                     |
| Develop training materials and tools                                              | Once in year 1 only         | Once in year 1 only                      | Once in year 1 only                                                                 |
| Training of trainers at the national level                                        | Once in year 1 only         | Once in year 1 only                      | Once in year 1 only                                                                 |

| Activities                                                                      | Scenario 1: Campaign                               | Scenario 2: Routine EPI                            | Scenario 3: Mixed delivery                         |
|---------------------------------------------------------------------------------|----------------------------------------------------|----------------------------------------------------|----------------------------------------------------|
| Training at the regional level                                                  | Once in year 1 only                                | Once in year 1 only                                | Once in year 1 only                                |
| Training at district levels                                                     | Once in year 1 only                                | Once in year 1 only                                | Once in year 1 only                                |
| Training at the health facility level                                           | Once in year 1 only                                | Once in year 1 only                                | Once in year 1 only                                |
| Training of community health workers/volunteers for campaign                    | Once in year 1 only                                | NA                                                 | Once in year 1 only                                |
| <b>Initial sensitization</b>                                                    |                                                    |                                                    |                                                    |
| Stakeholder sensitization at national level                                     | Once in year 1 only                                | Once in year 1 only                                | Once in year 1 and 2 only                          |
| Sensitization of media personnel at national level                              | Once in year 1 only                                | Once in year 1 only                                | Once in year 1 and 2 only                          |
| Stakeholder sensitization at regional level                                     | Once in year 1 only                                | Once in year 1 only                                | Once in year 1 and 2 only                          |
| Stakeholder sensitization at district level                                     | Once in year 1 only                                | Once in year 1 only                                | Once in year 1 and 2 only                          |
| Stakeholder sensitization at health facility level                              | Once in year 1 only                                | Once in year 1 only                                | Once in year 1 and 2 only                          |
| <b>Communication</b>                                                            |                                                    |                                                    |                                                    |
| Development and production of communication materials (Flip charts, posters)    | Once in year 1 only                                | Once in year 1 only                                | Once in year 1 only                                |
| Develop radio/TV message, newspaper spots etc.                                  | Once each year                                     | Once in year 1 only                                | Once each year                                     |
| Broadcasting of TV/radio messages, and new paper messages                       | Once each year                                     | Once in year 1 only                                | Once each year                                     |
| Organize media campaigns at regional level                                      | Once each year                                     | Once in year 1 only                                | Once each year                                     |
| Organize media campaigns at district level                                      | Once each year                                     | Once in year 1 only                                | Once each year                                     |
| <b>Social mobilization</b>                                                      |                                                    |                                                    |                                                    |
| Launch event at national level                                                  | Once in year 1 only                                | Once in year 1 only                                | Once in year 1 and 2 only                          |
| Launch event at regional level                                                  | Once in year 1 only                                | Once in year 1 only                                | Once in year 1 and 2 only                          |
| Organize awareness raising by town criers and mobilizing relays in the villages | Each year, integrated activity- no additional cost | Each year, integrated activity- no additional cost | Each year, integrated activity- no additional cost |
| Carry out educational talks in health facilities                                | Each year, integrated activity- no additional cost | Each year, integrated activity- no additional cost | Each year, integrated activity- no additional cost |
| <b>Monitoring and evaluation</b>                                                |                                                    |                                                    |                                                    |
| Printing and distribution of monitoring and evaluation tools                    | Each year                                          | Each year                                          | Each year                                          |
| Conduct pre and post coverage surveys                                           | Year 2 only                                        | Year 2 only                                        | Year 2 only                                        |

| Activities                                                                               | Scenario 1: Campaign   | Scenario 2: Routine EPI           | Scenario 3: Mixed delivery                           |
|------------------------------------------------------------------------------------------|------------------------|-----------------------------------|------------------------------------------------------|
| <b>Supervision</b>                                                                       |                        |                                   |                                                      |
| Implementation (introduction and post introduction) supervision at regional level        | Three times each year  | Two times in years 1 only         | Two times in year 1 and one time each in other years |
| Implementation (introduction and post introduction) supervision at district level        | Three times each year  | Two times in years 1 only         | Two times each year                                  |
| Implementation (introduction and post introduction) supervision at health facility level | Three times each year  | Two times in years 1 only         | Two times each year                                  |
| Routine quarterly supervision by EPI program management                                  | NA                     | Four times each year, shared cost | Four times each year, shared cost                    |
| Routine semi-annual supervision of immunization program by regional level staff          | NA                     | Two times each year, shared cost  | Two times each year, shared cost                     |
| Routine semi-annual supportive supervision by district level staff                       | NA                     | Two times each year, shared cost  | Two times each year, shared cost                     |
| <b>Service delivery</b>                                                                  |                        |                                   |                                                      |
| Vaccination administration through routine EPI clinic (fixed strategy)                   | NA                     | Each year                         | Each year                                            |
| Vaccination administration through routine EPI outreach (advanced strategy)              | NA                     | Each year                         | Each year                                            |
| Vaccination administration during seasonal campaign                                      | Three times each year  | NA                                | One time each year starting year 2                   |
| <b>Cold chain procurement</b>                                                            |                        |                                   |                                                      |
| Cold room walk in (capacity: 30 cu m) added at national level                            | Years 1, 3, and 5      | Years 1, 3, and 5                 | Years 1, 3, and 5                                    |
| Cold room walk in (capacity: 10 cu m) added to 11 regional levels                        | Years 1, and 3         | Years 1, and 3                    | Years 1, and 3                                       |
| Refrigerators (capacity: 145,000 cu cm) added to 75 district levels                      | Years 1, and 3         | Years 1, and 3                    | Years 1, and 3                                       |
| Cold boxes added to each health facility (5 cold boxes per health facility)              | Years 1, and 3         | Years 1, and 3                    | Years 1, and 3                                       |
| Maintenance of cold chain                                                                | Each year, shared cost | Each year, shared cost            | Each year, shared cost                               |
| <b>Other capital equipment purchase</b>                                                  |                        |                                   |                                                      |
| Vehicles purchase to support implementation                                              | NA                     | NA                                | NA                                                   |

**Appendix Table 2: List of unit costs used in the analysis****Mali**

| Items                                                         | Units                                | Unit price (LCU) |
|---------------------------------------------------------------|--------------------------------------|------------------|
| <b>Allowance and per diems<sup>1</sup></b>                    |                                      |                  |
| Per diem for non-resident, participant, National level        | Per person per day                   | 15,000           |
| Per diem for non-resident, facilitator National level         | Per person per day                   | 45,000           |
| Per diem for non-resident, participant, Regional level        | Per person per day                   | 5,000            |
| Per diem for non-resident, facilitator Regional level         | Per person per day                   | 35,000           |
| Per diem for non-resident, participant, District level        | Per person per day                   | 5,000            |
| Per diem for non-resident, facilitator District level         | Per person per day                   | 15,000           |
| Allowance for community mobilization, leaders, National level | Per person per day                   | 35,000           |
| Allowance for community mobilization, leaders, Regional level | Per person per day                   | 35,000           |
| Allowance for community mobilization, leaders, District level | Per person per day                   | 35,000           |
| Allowance for community mobilization, participants, all level | Per person per day                   | 5,000            |
| Allowance for vaccine loaders                                 | Per person per day                   | 10,000           |
| Transportation allowance for staff, average                   | Per person, both ways                | 5,000            |
| Transportation allowance for staff, long distance             | Per person, both ways                | 30,000           |
| Transportation allowance for non-staff, average               | Per person, both ways                | 5,000            |
| Transportation allowance for non-staff, long distance         | Per person, both ways                | 12,500           |
| Community volunteers' allowance                               | Per person per day                   | 3,000            |
| Master of Ceremony for National launch event                  | Per person per day                   | 150,000          |
| Allowance for Hostesses for National launch event             | Per person per day                   | 15,000           |
| <b>Supplies and consumables<sup>2</sup></b>                   |                                      |                  |
| Photocopy ink                                                 | Each                                 | 80,000           |
| Printing paper rim                                            | Each                                 | 5,000            |
| Report printing                                               | Each                                 | 15,000           |
| Pen                                                           | Each                                 | 100              |
| Notepad                                                       | Each                                 | 1,500            |
| Large paper rolls                                             | Each                                 | 10,000           |
| Markers                                                       | Each                                 | 1,000            |
| Stationery package for training, National level               | Each                                 | 2,500            |
| Stationery package for training, Health facility level        | Each                                 | 1,500            |
| Drawing and recording materials                               | Per training                         | 50,000           |
| Drawing of sample and acquisition of SE maps                  | Per campaign planning event          | 6,000            |
| Trailer/Spot/Sketch translation fees                          | Translation in different languages   | 20,000           |
| Production of skit/sketch for Television                      | Production fees                      | 2,000,000        |
| Production of Spot/trailer for Television                     | Production fees                      | 200,000          |
| Production of Spot/trailer for Radio                          | Production fees                      | 200,000          |
| Broadcasting of trailer/spots in Television                   | Cost for one broadcast in Television | 75,000           |
| Broadcasting of skit/sketch in Television                     | Cost per show                        | 200,000          |

|                                                            |                                      |           |
|------------------------------------------------------------|--------------------------------------|-----------|
| Broadcasting of spots/trailer in Radio                     | Cost per airing                      | 50,000    |
| Newspaper inserts                                          | Cost per insert                      | 75,000    |
| Tarpaulin banners production                               | Cost per banner                      | 60,000    |
| Printing leaflet (small)                                   | Cost of printing one leaflet         | 200       |
| Printing leaflet (large)                                   | Cost of printing one leaflet         | 1,500     |
| Printing poster                                            | Cost of printing one poster          | 20,000    |
| Invitation card for program launch and social mobilization | Cost of printing one invitation card | 1,000     |
| Printing manuals                                           | Cost of printing                     | 5,000     |
| Vaccination register                                       | Per unit                             | 2,424     |
| Tally register                                             | Per unit                             | 4,848     |
| Monthly vaccination report                                 | Per unit                             | 2,424     |
| Cotton                                                     | Per unit                             | 4         |
| Designer contract for developing communication material    | Per unit                             | 200,000   |
| Coordination of community information activity             | Flat cost at National level          | 75,000    |
| Hold launches and information sharing session              | Flat cost per district               | 250,000   |
| Printing T-shirt and caps for social mobilization          | Cost per unit                        | 200       |
| <b>Other direct costs</b>                                  |                                      |           |
| Hall/venue rental, large size, National level              | Per day                              | 1,000,000 |
| Hall/venue rental, medium size, National level             | Per day                              | 500,000   |
| Hall/venue rental, small size, National level              | Per day                              | 250,000   |
| Hall/venue rental, large size, Regional level              | Per day                              | 375,000   |
| Hall/venue rental, medium size, Regional level             | Per day                              | 200,000   |
| Hall/venue rental, small size, Regional level              | Per day                              | 75,000    |
| Hall/venue rental, large size, District level              | Per day                              | 150,000   |
| Hall/venue rental, medium size, District level             | Per day                              | 75,000    |
| Hall/venue rental, small size, District level              | Per day                              | 75,000    |
| Refreshments (coffee, snacks)                              | Per person per day                   | 1,500     |
| Lunch                                                      | Per person per day                   | 2,500     |
| Dinner                                                     | Per person per day                   | 2,500     |
| Vehicle hire, small size (Car)                             | Per vehicle per day                  | 50,000    |
| Vehicle hire, medium size (Vans)                           | Per vehicle per day                  | 75,000    |
| Vehicle hire, large size (truck)                           | Per vehicle per day                  | 200,000   |
| Fuel cost                                                  | Per liter                            | 660       |
| Trampoline rental                                          | Cost per day                         | 20,000    |
| Sound equipment rental                                     | Cost per day                         | 100,000   |
| Animation artist service contract                          | Per unit                             | 250,000   |
| Media coverage at National level event                     | Cost per day                         | 5,000     |
| Chairs rental- metal                                       | Cost per day                         | 100       |
| Chairs rental- plastic                                     | Cost per day                         | 200       |
| Communication costs reimbursement                          | Flat cost per person                 | 20,000    |
| Average toll/peage                                         | Per trip                             | 15,750    |
| <b>Cold chain and equipment <sup>3, 4</sup></b>            | <b>Capacity cm3</b>                  |           |



|                                           |            |        |
|-------------------------------------------|------------|--------|
| Cold room, walk-in type,10 m <sup>3</sup> | 10,000,000 | 15,100 |
| Cold room, walk-in type,30 m <sup>3</sup> | 30,000,000 | 22,500 |
| Cold room, walk-in type,40 m <sup>3</sup> | 40,000,000 | 27,000 |
| Mains Ref Sure Chill GVR50AC E003/046     | 46,500     | 1,642  |
| Mains Ref Sure Chill GVR100AC-M1 E003/047 | 99,000     | 2,355  |
| Cold box, RCW 12/CF,PQS E004/004          | 7,000      | 614    |
| Mains Ref. Vestfrost VLS400A AC E003/065  | 145,000    | 1,322  |
| Mains Ref Aucma MetafridgeCFD50 E003/079  | 50,000     | 1,400  |
| Mains Ref Dulas VC225ILR E003/072         | 184,000    | 3,318  |
| Mains Ref. Vestfrost VLS400A AC E003/065  | 145,000    | 1,322  |
| Mains Ref Aucma MetafridgeCFD50 E003/079  | 50,000     | 1,400  |
| Mains Ref SurChl GVR99Lite AC E003/082    | 98,500     | 1,200  |
| Mains Ref SureChill GVR225AC-M1 E003/083  | 225,000    | 1,910  |
| TCW 2000 AC                               | 60,000     | 3,034  |
| TCW 3000 AC                               | 150,000    | 4,346  |
| Cold Box, BlowKing CB/20-CF               | 20,000     | 200    |
| TCW15SDD                                  | 16,000     | 4,584  |
| VLS200A                                   | 60,000     | 818    |
| VLS154                                    | 170,000    | 3,140  |
| TCW4000AC                                 | 240,000    | 3,896  |
| VLS400A                                   | 145,000    | 1,118  |

**Sources:**<sup>1</sup> MOH/EPI<sup>2</sup> Previous new vaccine introduction activity reports from EPI<sup>3</sup> UNICEF Supply Catalogue (last checked Jan 2018)<sup>4</sup> Assumptions informed by Kenya Malaria vaccine implementation program costs**Burkina Faso**

| Items                                                     | Units              | Unit price (LCU) |
|-----------------------------------------------------------|--------------------|------------------|
| <b>Allowance and per diems<sup>1</sup></b>                |                    |                  |
| Per diem for resident, Directors                          | Per person per day | 20,000           |
| Per diem for non-resident, Directors                      | Per person per day | 30,000           |
| Per diem for resident, Senior/mid-level Officers          | Per person per day | 10,000           |
| Per diem for non-resident, Senior/mid-level Officers      | Per person per day | 27,000           |
| Per diem for resident, administrative support/Drivers     | Per person per day | 10,000           |
| Per diem for non-resident, administrative support/Drivers | Per person per day | 20,000           |
| Per diem for resident, Health facility staff              | Per person per day | 5,000            |
| Per diem for non-resident, Health facility staff          | Per person per day | 10,000           |
| Allowance for material handlers, National level           | Per person per day | 5,000            |
| Allowance for material handlers, District level           | Per person per day | 2,000            |
| Per diem for resident, non-staff                          | Per person per day | 10,000           |
| Per diem for non-resident, non-staff                      | Per person per day | 27,000           |

|                                                         |                               |            |
|---------------------------------------------------------|-------------------------------|------------|
| Transportation allowance for non-staff                  | Per person, both ways         | 5,000      |
| Lunch allowance - District level                        | Per person per day            | 1,500      |
| Lunch allowance - Health facility level                 | Per person per day            | 1,000      |
| Per diem during campaign, Health facility staff         | Per person per day            | 5,000      |
| <b>Supplies and consumables<sup>2</sup></b>             |                               |            |
| Notebook                                                | Per piece                     | 1,000      |
| Pen                                                     | Per piece                     | 100        |
| Ink (printer cartridge)                                 | Per piece                     | 65,000     |
| Printing paper                                          | Per piece                     | 4,000      |
| Folders                                                 | Per piece                     | 1,000      |
| Stationery package for training, Health facility level  | Per unit                      | 1,000      |
| Stationery package for training, National level         | Per unit                      | 2,500      |
| Printing poster/vaccine calendar                        | Cost per unit                 | 3,000      |
| Monthly reporting tools                                 | Cost per unit                 | 710        |
| Purchase order form for vaccine                         | Cost per unit                 | 3,600      |
| Monitoring graphic                                      | Cost per unit                 | 380        |
| Tally sheet                                             | Cost per unit                 | 40         |
| Register for consumables management                     | Cost per unit                 | 4,300      |
| Register for vaccine management                         | Cost per unit                 | 5,950      |
| Vaccination card                                        | Cost per unit                 | 15         |
| Plaidoyer (Advocacy) - Flat cost per region             | Flat cost per region          | 400,000    |
| Plaidoyer (Advocacy) - Flat cost per District           | Flat cost per district        | 200,000    |
| Community sensitization - Flat cost per Health Facility | Flat cost per health facility | 7,500      |
| Launch event at National level - Flat cost              | Flat cost at National level   | 3,000,000  |
| Launch event at Regional level - Flat cost              | Flat cost at Regional level   | 300,000    |
| Post introduction survey                                | Flat cost-no detail available | 60,000,000 |
| Development of TV spots                                 | Cost per unit paid to media   | 625,000    |
| Development of radio spots                              | Cost per unit paid to media   | 85,000     |
| Broadcasting messages in TV                             | Cost per broadcast            | 110,000    |
| Broadcasting messages in radio                          | Cost per broadcast            | 8,000      |
| Media coverage - Newspaper Interview (Midi magazine)    | Per unit                      | 300,000    |
| Media coverage - at National level                      | Per unit                      | 250,000    |
| Media coverage TV-Radio program at Regional level       | Per unit                      | 100,000    |
| Media coverage TV-Radio program at District level       | Per unit                      | 100,000    |
| <b>Other direct costs<sup>2</sup></b>                   |                               |            |
| Hall/venue rental, large size, National level           | per day                       | 250,000    |
| Hall/venue rental, medium size, National level          | per day                       | 150,000    |
| Hall/venue rental, small size, National level           | per day                       | 100,000    |
| Hall/venue rental, large size, Regional level           | per day                       | 100,000    |
| Refreshments (coffee, snacks)- National level           | Per person per day            | 2,500      |
| Refreshments (coffee, snacks)- Region/District/HF       | Per person per day            | 1,000      |

|                                                          |                      |        |
|----------------------------------------------------------|----------------------|--------|
| Lunch - National level                                   | Per person per day   | 5,000  |
| Lunch - Regional level                                   | Per person per day   | 2,500  |
| Lunch - District/HF level                                | Per person per day   | 1,500  |
| Cocktail                                                 | Per person per day   | 12,500 |
| Fuel- reimbursement at National and regional level       | Reimbursement per KM | 105    |
| Fuel- reimbursement at district level to health facility | Reimbursement per KM | 40     |
| Vehicle hire, medium                                     | Per vehicle per day  | 75,000 |
| Vehicle hire, large size (truck)                         | Per vehicle per day  | 75,000 |
| Fuel                                                     | Per liter            | 615    |
| <b>Cold chain and equipment</b> <sup>3,4</sup>           | <b>Capacity cm3</b>  |        |
| Cold room, walk-in type,10 m <sup>3</sup>                | 10,000,000           | 15,100 |
| Cold room, walk-in type,30 m <sup>3</sup>                | 30,000,000           | 22,500 |
| Cold room, walk-in type,40 m <sup>3</sup>                | 40,000,000           | 27,000 |
| Mains Ref SureChill GVR50AC E003/046                     | 46,500               | 1,642  |
| Mains Ref SureChill GVR100AC-M1 E003/047                 | 99,000               | 2,355  |
| Cold box, RCW 12/CF,PQS E004/004                         | 7,000                | 614    |
| Mains Ref. Vestfrost VLS400A AC E003/065                 | 145,000              | 1,322  |
| Mains Ref Aucma MetafridgeCFD50 E003/079                 | 50,000               | 1,400  |
| Mains Ref Dulas VC225ILR E003/072                        | 184,000              | 3,318  |
| Mains Ref. Vestfrost VLS400A AC E003/065                 | 145,000              | 1,322  |
| Mains Ref Aucma MetafridgeCFD50 E003/079                 | 50,000               | 1,400  |
| Mains Ref SurChl GVR99Lite AC E003/082                   | 98,500               | 1,200  |
| Mains Ref SureChill GVR225AC-M1 E003/083                 | 225,000              | 1,910  |
| TCW 2000 AC                                              | 60,000               | 3,034  |
| TCW 3000 AC                                              | 150,000              | 4,346  |
| Cold Box, BlowKing CB/20-CF                              | 20,000               | 200    |
| TCW15SDD                                                 | 16,000               | 4,584  |
| VLS200A                                                  | 60,000               | 818    |
| VLS154                                                   | 170,000              | 3,140  |
| TCW4000AC                                                | 240,000              | 3,896  |
| VLS400A                                                  | 145,000              | 1,118  |

**Sources:**<sup>1</sup> MOH/EPI<sup>2</sup> Previous new vaccine introduction activity reports from EPI<sup>3</sup> UNICEF Supply Catalogue (last checked Jan 2018)<sup>4</sup> Assumptions informed by Kenya Malaria vaccine implementation program costs

**Appendix Table 3.a: List of districts and facilities surveyed in Mali**

|                       | Name of the Institution/facility                                      |
|-----------------------|-----------------------------------------------------------------------|
| National level        | National Center of Immunization (NIC)                                 |
|                       | National Malaria Control Program (NMP)                                |
|                       | Technical Advisory Group for Vaccine and Immunization (NITAG or GTCV) |
|                       | National Center for Information, Education of the State (CNIECS)      |
| Regional level        | Regional Health Directorate (DRS) of Koulikoro                        |
| Health district level | District Health Office, Bougouni                                      |
|                       | District Health Office, Diema                                         |
| Health facility level | Bougouni-Nord                                                         |
|                       | Bougouni-Sud                                                          |
|                       | Bougouni-Ouest                                                        |
|                       | Kaumontou                                                             |
|                       | Diema-Central                                                         |
|                       | Diancounte-Camara                                                     |
|                       | Tinkaré                                                               |

**Appendix Table 3.b: List of districts and facilities surveyed in Burkina Faso**

|                       | Name of the Institution/facility                    |
|-----------------------|-----------------------------------------------------|
| National level        | Direction de la Prevention par la Vaccination (DPV) |
| Regional level        | Region Centre Ouest,                                |
| Health district level | Nanoro health district                              |
| Health facility level | Secteur 23 Tanghin                                  |
|                       | Secteur 27 Wayalghin                                |
|                       | Roumtenga                                           |
|                       | Sakoula                                             |
|                       | Pella                                               |
|                       | Somassi                                             |
|                       | Siglè                                               |
|                       | Nanoro                                              |

**Appendix Table 4: Unit cost calculations**

| Metric                                        | Definition                                                                                                                                                                                                        | Calculations                                                                                                                                                                                                                                                                                                                                |
|-----------------------------------------------|-------------------------------------------------------------------------------------------------------------------------------------------------------------------------------------------------------------------|---------------------------------------------------------------------------------------------------------------------------------------------------------------------------------------------------------------------------------------------------------------------------------------------------------------------------------------------|
| Cost per dose administered                    | Total cost of the program (both introduction and recurrent), inclusive of commodity costs, divided by the total expected number of vaccinations over a given period of time.                                      | $= \frac{\sum_{i=1}^n \text{cost of activity}_i}{\text{Number of vaccine doses administered}}$ <p>Where, i = activity groups used in costing</p>                                                                                                                                                                                            |
| Cost of delivery per dose                     | Total cost of the program (both introduction and recurrent), less the commodity related cost, divided by the total expected number of vaccinations over a given period of time.                                   | $= \frac{\sum_{i=1}^n \text{cost of activity}_i - \text{cost of immunization commodity}}{\text{Number of vaccine doses administered}}$ <p>Where, i = activity groups used in costing<br/>Immunization commodities include vaccines, injection supplies, procurement add on charges on these commodities</p>                                 |
| Cost of delivery per first 3 doses completion | Total cost of the program (both introduction and recurrent), less the commodity related cost, divided by the total expected number of children who complete the first three doses of over a given period of time. | $= \frac{\sum_{i=1}^n \text{cost of activity}_i}{\text{Number of children who receive at least the first 3 doses of vaccine}}$ <p>Where, i = activity groups used in costing<br/>Pri</p>                                                                                                                                                    |
| Cost of delivery per first 3 doses completion | Total cost of the program (both introduction and recurrent), less the commodity related cost, divided by the total expected number of children who complete the first three doses of over a given period of time. | $= \frac{\sum_{i=1}^n \text{cost of activity}_i - \text{cost of immunization commodity}}{\text{Number of children who receive at least the first 3 doses of vaccine}}$ <p>Where, i = activity groups used in costing<br/>Immunization commodities include vaccines, injection supplies, procurement add on charges on these commodities</p> |

**Appendix Table 5.a: RTS,S introduction and delivery cost drivers in Mali, scenario 1: Mass campaign**

| Cost categories                                                                                       | Financial cost    |             |                   | Economic cost      |             |                   |
|-------------------------------------------------------------------------------------------------------|-------------------|-------------|-------------------|--------------------|-------------|-------------------|
|                                                                                                       | USD               | %           | % w/o commodities | USD                | %           | % w/o commodities |
| Vaccines and Injectable Supplies                                                                      | 14,403,323        | 26.3%       | NA                | 132,402,606        | 75.6%       | NA                |
| Service Delivery                                                                                      | 14,384,942        | 26.3%       | 35.7%             | 15,226,456         | 8.7%        | 35.6%             |
| Planning and coordination                                                                             | 1,554,067         | 2.8%        | 3.9%              | 1,795,925          | 1.0%        | 4.2%              |
| Training                                                                                              | 5,209,902         | 9.5%        | 12.9%             | 5,540,074          | 3.2%        | 13.0%             |
| Information, Education and Communication                                                              | 1,076,902         | 2.0%        | 2.7%              | 1,135,973          | 0.6%        | 2.7%              |
| Social Mobilization                                                                                   | 1,875,034         | 3.4%        | 4.7%              | 1,881,866          | 1.1%        | 4.4%              |
| Monitoring and Evaluation                                                                             | 500,012           | 0.9%        | 1.2%              | 500,012            | 0.3%        | 1.2%              |
| Supervision                                                                                           | 5,447,908         | 10.0%       | 13.5%             | 6,406,462          | 3.7%        | 15.0%             |
| Distribution                                                                                          | 1,136,620         | 2.1%        | 2.8%              | 1,159,810          | 0.7%        | 2.7%              |
| Cold Chain Equipment                                                                                  | 3,333,958         | 6.1%        | 8.3%              | 3,333,958          | 1.9%        | 7.8%              |
| Other Logistical Equipment                                                                            | 5,743,620         | 10.5%       | 14.3%             | 5,743,620          | 3.3%        | 13.4%             |
| <b>Total cost (full cost, initial investment + recurrent)</b>                                         | <b>54,666,288</b> | <b>100%</b> |                   | <b>175,126,762</b> | <b>100%</b> |                   |
| <b>Total cost (full cost, initial investment + recurrent) without vaccines and injection supplies</b> | <b>40,262,966</b> |             | <b>100.0%</b>     | <b>42,724,156</b>  |             | <b>100.0%</b>     |

Note: Cost drivers in Mali derived under baseline input assumptions, for mass campaign delivery modality.

**Appendix Table 5.b: RTS,S introduction and delivery cost drivers in Mali, scenario 2: Routine EPI**

| Cost categories                                                                                       | Financial cost    |             |                   | Economic cost      |             |                   |
|-------------------------------------------------------------------------------------------------------|-------------------|-------------|-------------------|--------------------|-------------|-------------------|
|                                                                                                       | USD               | %           | % w/o commodities | USD                | %           | % w/o commodities |
| Vaccines and Injectable Supplies                                                                      | 14,403,323        | 48.4%       | NA                | 132,402,606        | 88.9%       | NA                |
| Service Delivery                                                                                      | 359,339           | 1.2%        | 2.3%              | 1,033,941          | 0.7%        | 6.2%              |
| Planning and coordination                                                                             | 327,614           | 1.1%        | 2.1%              | 376,712            | 0.3%        | 2.3%              |
| Training                                                                                              | 1,962,848         | 6.6%        | 12.8%             | 2,079,762          | 1.4%        | 12.6%             |
| Information, Education and Communication                                                              | 1,007,408         | 3.4%        | 6.6%              | 1,066,478          | 0.7%        | 6.4%              |
| Social Mobilization                                                                                   | 745,533           | 2.5%        | 4.9%              | 748,283            | 0.5%        | 4.5%              |
| Monitoring and Evaluation                                                                             | 20,000            | 0.1%        | 0.1%              | 20,000             | 0.0%        | 0.1%              |
| Supervision                                                                                           | 1,528,660         | 5.1%        | 10.0%             | 1,794,064          | 1.2%        | 10.8%             |
| Distribution                                                                                          | 327,157           | 1.1%        | 2.1%              | 347,373            | 0.2%        | 2.1%              |
| Cold Chain Equipment                                                                                  | 3,333,958         | 11.2%       | 21.7%             | 3,333,958          | 2.2%        | 20.2%             |
| Other Logistical Equipment                                                                            | 5,743,620         | 19.3%       | 37.4%             | 5,743,620          | 3.9%        | 34.7%             |
| <b>Total cost (full cost, initial investment + recurrent)</b>                                         | <b>29,759,460</b> | <b>100%</b> |                   | <b>148,946,798</b> | <b>100%</b> |                   |
| <b>Total cost (full cost, initial investment + recurrent) without vaccines and injection supplies</b> | <b>15,356,137</b> |             | <b>100.0%</b>     | <b>16,544,192</b>  |             | <b>100.0%</b>     |

*Note: Cost drivers in Mali derived under baseline input assumptions, for routine EPI delivery modality.*

**Appendix Table 5.c: RTS,S introduction and delivery cost drivers in Mali, scenario 3: Mixed delivery**

| Cost categories                                                                                       | Financial cost    |             |                   | Economic cost      |             |                   |
|-------------------------------------------------------------------------------------------------------|-------------------|-------------|-------------------|--------------------|-------------|-------------------|
|                                                                                                       | USD               | %           | % w/o commodities | USD                | %           | % w/o commodities |
| Vaccines and Injectable Supplies                                                                      | 14,403,323        | 35.7%       | NA                | 132,402,606        | 82.7%       | NA                |
| Service Delivery                                                                                      | 3,164,460         | 7.9%        | 12.2%             | 3,872,444          | 2.4%        | 14.0%             |
| Planning and coordination                                                                             | 1,554,375         | 3.9%        | 6.0%              | 1,796,268          | 1.1%        | 6.5%              |
| Training                                                                                              | 5,209,902         | 12.9%       | 20.1%             | 5,540,074          | 3.5%        | 20.0%             |
| Information, Education and Communication                                                              | 1,224,578         | 3.0%        | 4.7%              | 1,283,648          | 0.8%        | 4.6%              |
| Social Mobilization                                                                                   | 1,875,034         | 4.7%        | 7.2%              | 1,881,866          | 1.2%        | 6.8%              |
| Monitoring and Evaluation                                                                             | 500,012           | 1.2%        | 1.9%              | 500,012            | 0.3%        | 1.8%              |
| Supervision                                                                                           | 2,618,242         | 6.5%        | 10.1%             | 3,075,357          | 1.9%        | 11.1%             |
| Distribution                                                                                          | 674,945           | 1.7%        | 2.6%              | 701,688            | 0.4%        | 2.5%              |
| Cold Chain Equipment                                                                                  | 3,333,958         | 8.3%        | 12.9%             | 3,333,958          | 2.1%        | 12.0%             |
| Other Logistical Equipment                                                                            | 5,743,620         | 14.3%       | 22.2%             | 5,743,620          | 3.6%        | 20.7%             |
| <b>Total cost (full cost, initial investment + recurrent)</b>                                         | <b>40,302,449</b> | <b>100%</b> |                   | <b>160,131,541</b> | <b>100%</b> |                   |
| <b>Total cost (full cost, initial investment + recurrent) without vaccines and injection supplies</b> | <b>25,899,126</b> |             | <b>100.0%</b>     | <b>27,728,935</b>  |             | <b>100.0%</b>     |

*Note: Cost drivers in Mali derived under baseline input assumptions, for mixed delivery modality.*

**Appendix Table 6.a: RTS,S introduction and delivery cost drivers in Burkina Faso, scenario 1: Mass campaign**

| Cost categories                                               | Financial cost    |               |                   | Economic cost      |               |                   |
|---------------------------------------------------------------|-------------------|---------------|-------------------|--------------------|---------------|-------------------|
|                                                               | USD               | %             | % w/o commodities | USD                | %             | % w/o commodities |
| Vaccines and Injectable Supplies                              | 13,647,445        | 41.8%         | NA                | 125,454,195        | 84.8%         | NA                |
| Service Delivery                                              | 10,404,650        | 31.9%         | 54.8%             | 12,796,524         | 8.7%          | 57.0%             |
| Planning and coordination                                     | 995,501           | 3.0%          | 5.2%              | 1,426,266          | 1.0%          | 6.4%              |
| Training                                                      | 434,792           | 1.3%          | 2.3%              | 547,837            | 0.4%          | 2.4%              |
| Initial Sensitization                                         | 84,044            | 0.3%          | 0.4%              | 139,710            | 0.1%          | 0.6%              |
| Communication                                                 | 186,940           | 0.6%          | 1.0%              | 186,940            | 0.1%          | 0.8%              |
| Social Mobilization                                           | 23,976            | 0.1%          | 0.1%              | 32,476             | 0.0%          | 0.1%              |
| Monitoring and Evaluation                                     | 135,274           | 0.4%          | 0.7%              | 167,098            | 0.1%          | 0.7%              |
| Supervision                                                   | 1,094,491         | 3.4%          | 5.8%              | 1,363,940          | 0.9%          | 6.1%              |
| Distribution                                                  | 549,530           | 1.7%          | 2.9%              | 699,601            | 0.5%          | 3.1%              |
| Cold Chain Equipment                                          | 5,091,141         | 15.6%         | 26.8%             | 5,091,141          | 3.4%          | 22.7%             |
| <b>Total cost (full cost, initial investment + recurrent)</b> | <b>32,647,782</b> | <b>100.0%</b> |                   | <b>147,905,729</b> | <b>100.0%</b> |                   |

|                                                                                                       |                   |  |               |                   |  |               |
|-------------------------------------------------------------------------------------------------------|-------------------|--|---------------|-------------------|--|---------------|
| <b>Total cost (full cost, initial investment + recurrent) without vaccines and injection supplies</b> | <b>19,000,337</b> |  | <b>100.0%</b> | <b>22,451,534</b> |  | <b>100.0%</b> |
|-------------------------------------------------------------------------------------------------------|-------------------|--|---------------|-------------------|--|---------------|

*Note: Cost drivers in Burkina Faso derived under baseline input assumptions, for mass campaign delivery modality.*

**Appendix Table 6.b: RTS,S introduction and delivery cost drivers in Burkina Faso, scenario 2: Routine EPI**

| Cost categories                                                                                       | Financial cost    |               |                   | Economic cost      |               |                   |
|-------------------------------------------------------------------------------------------------------|-------------------|---------------|-------------------|--------------------|---------------|-------------------|
|                                                                                                       | USD               | %             | % w/o commodities | USD                | %             | % w/o commodities |
| Vaccines and Injectable Supplies                                                                      | 13,647,445        | 64.5%         | NA                | 125,454,195        | 93.2%         | NA                |
| Service Delivery                                                                                      | 572,615           | 2.7%          | 7.6%              | 1,415,750          | 1.1%          | 15.5%             |
| Planning and coordination                                                                             | 399,165           | 1.9%          | 5.3%              | 596,612            | 0.4%          | 6.5%              |
| Training                                                                                              | 222,374           | 1.1%          | 3.0%              | 316,108            | 0.2%          | 3.5%              |
| Initial Sensitization                                                                                 | 84,044            | 0.4%          | 1.1%              | 139,710            | 0.1%          | 1.5%              |
| Communication                                                                                         | 58,236            | 0.3%          | 0.8%              | 58,236             | 0.0%          | 0.6%              |
| Social Mobilization                                                                                   | 23,976            | 0.1%          | 0.3%              | 32,476             | 0.0%          | 0.4%              |
| Monitoring and Evaluation                                                                             | 135,274           | 0.6%          | 1.8%              | 167,098            | 0.1%          | 1.8%              |
| Supervision                                                                                           | 733,968           | 3.5%          | 9.8%              | 1,117,069          | 0.8%          | 12.2%             |
| Distribution                                                                                          | 183,722           | 0.9%          | 2.4%              | 218,312            | 0.2%          | 2.4%              |
| Cold Chain Equipment                                                                                  | 5,091,141         | 24.1%         | 67.8%             | 5,091,141          | 3.8%          | 55.6%             |
| <b>Total cost (full cost, initial investment + recurrent)</b>                                         | <b>21,151,958</b> | <b>100.0%</b> |                   | <b>134,606,708</b> | <b>100.0%</b> |                   |
| <b>Total cost (full cost, initial investment + recurrent) without vaccines and injection supplies</b> | <b>7,504,513</b>  |               | <b>100.0%</b>     | <b>9,152,513</b>   |               | <b>100.0%</b>     |

*Note: Cost drivers in Burkina Faso derived under baseline input assumptions, for routine EPI delivery modality.*

**Appendix Table 6.c: RTS,S introduction and delivery cost drivers in Burkina Faso, scenario 3: Mixed delivery**

| Cost categories                  | Financial cost |       |                   | Economic cost |       |                   |
|----------------------------------|----------------|-------|-------------------|---------------|-------|-------------------|
|                                  | USD            | %     | % w/o commodities | USD           | %     | % w/o commodities |
| Vaccines and Injectable Supplies | 13,647,445     | 55.3% | NA                | 125,454,195   | 90.3% | NA                |
| Service Delivery                 | 2,539,022      | 10.3% | 23.1%             | 3,691,905     | 2.7%  | 27.4%             |
| Planning and coordination        | 1,159,656      | 4.7%  | 10.5%             | 1,684,445     | 1.2%  | 12.5%             |
| Training                         | 434,792        | 1.8%  | 3.9%              | 547,837       | 0.4%  | 4.1%              |
| Initial Sensitization            | 168,087        | 0.7%  | 1.5%              | 279,420       | 0.2%  | 2.1%              |
| Communication                    | 186,940        | 0.8%  | 1.7%              | 186,940       | 0.1%  | 1.4%              |
| Social Mobilization              | 23,976         | 0.1%  | 0.2%              | 32,476        | 0.0%  | 0.2%              |



|                                                                                                       |                   |               |               |                    |               |               |
|-------------------------------------------------------------------------------------------------------|-------------------|---------------|---------------|--------------------|---------------|---------------|
| Monitoring and Evaluation                                                                             | 135,274           | 0.5%          | 1.2%          | 167,098            | 0.1%          | 1.2%          |
| Supervision                                                                                           | 1,025,832         | 4.2%          | 9.3%          | 1,480,787          | 1.1%          | 11.0%         |
| Distribution                                                                                          | 247,704           | 1.0%          | 2.2%          | 288,248            | 0.2%          | 2.1%          |
| Cold Chain Equipment                                                                                  | 5,091,141         | 20.6%         | 46.2%         | 5,091,141          | 3.7%          | 37.9%         |
| <b>Total cost (full cost, initial investment + recurrent)</b>                                         | <b>24,659,868</b> | <b>100.0%</b> |               | <b>138,904,492</b> | <b>100.0%</b> |               |
| <b>Total cost (full cost, initial investment + recurrent) without vaccines and injection supplies</b> | <b>11,012,423</b> |               | <b>100.0%</b> | <b>13,450,297</b>  |               | <b>100.0%</b> |

Note: Cost drivers in Burkina Faso derived under baseline input assumptions, for mixed delivery modality.

**Appendix Table 7: Unit cost estimates (in USD) at various vaccine price assumptions**

| Metric                            | Vaccine price per dose | Sn1: Mass campaign |          | Sn2: Routine EPI |          | Sn3: Mixed delivery |          |
|-----------------------------------|------------------------|--------------------|----------|------------------|----------|---------------------|----------|
|                                   |                        | Financial          | Economic | Financial        | Economic | Financial           | Economic |
| <b>Mali</b>                       |                        |                    |          |                  |          |                     |          |
| Cost per dose administered        | \$2                    | \$2.34             | \$4.80   | \$1.10           | \$3.50   | \$1.62              | \$4.05   |
| Cost per dose administered        | \$5                    | \$2.71             | \$8.86   | \$1.47           | \$7.38   | \$2.00              | \$7.93   |
| Cost per dose administered        | \$10                   | \$3.33             | \$15.14  | \$2.09           | \$13.84  | \$2.62              | \$14.40  |
| Cost per first 3 doses completion | \$2                    | \$9.98             | \$21.93  | \$4.03           | \$15.74  | \$7.39              | \$19.21  |
| Cost per first 3 doses completion | \$5                    | \$11.08            | \$40.41  | \$5.80           | \$34.22  | \$9.16              | \$37.69  |
| Cost per first 3 doses completion | \$10                   | \$14.71            | \$71.22  | \$8.75           | \$65.03  | \$12.12             | \$68.51  |
| <b>Burkina Faso</b>               |                        |                    |          |                  |          |                     |          |
| Cost per dose administered        | \$2                    | \$1.33             | \$3.85   | \$0.73           | \$3.16   | \$0.92              | \$3.38   |
| Cost per dose administered        | \$5                    | \$1.71             | \$7.73   | \$1.11           | \$7.04   | \$1.29              | \$7.26   |
| Cost per dose administered        | \$10                   | \$2.33             | \$14.19  | \$1.73           | \$13.50  | \$1.91              | \$13.72  |
| Cost per first 3 doses completion | \$2                    | \$5.60             | \$17.72  | \$2.73           | \$14.41  | \$3.61              | \$15.48  |
| Cost per first 3 doses completion | \$5                    | \$7.37             | \$36.23  | \$4.51           | \$32.91  | \$5.38              | \$33.98  |
| Cost per first 3 doses completion | \$10                   | \$10.33            | \$67.07  | \$7.46           | \$63.76  | \$8.34              | \$64.82  |

Appendix Figure 1.a: Financial unit cost estimates across different scenarios

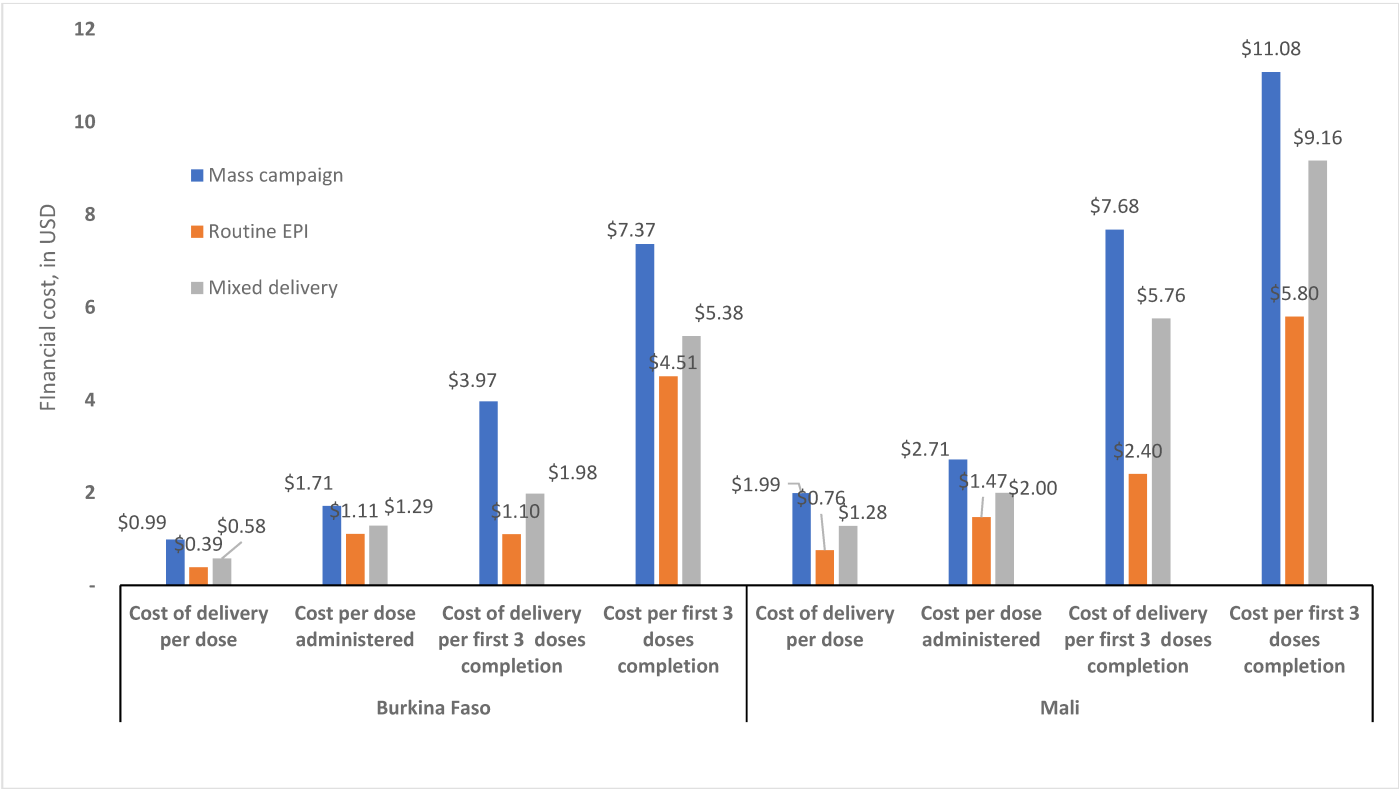

Appendix Figure 1.b: Economic unit cost estimates across different scenarios

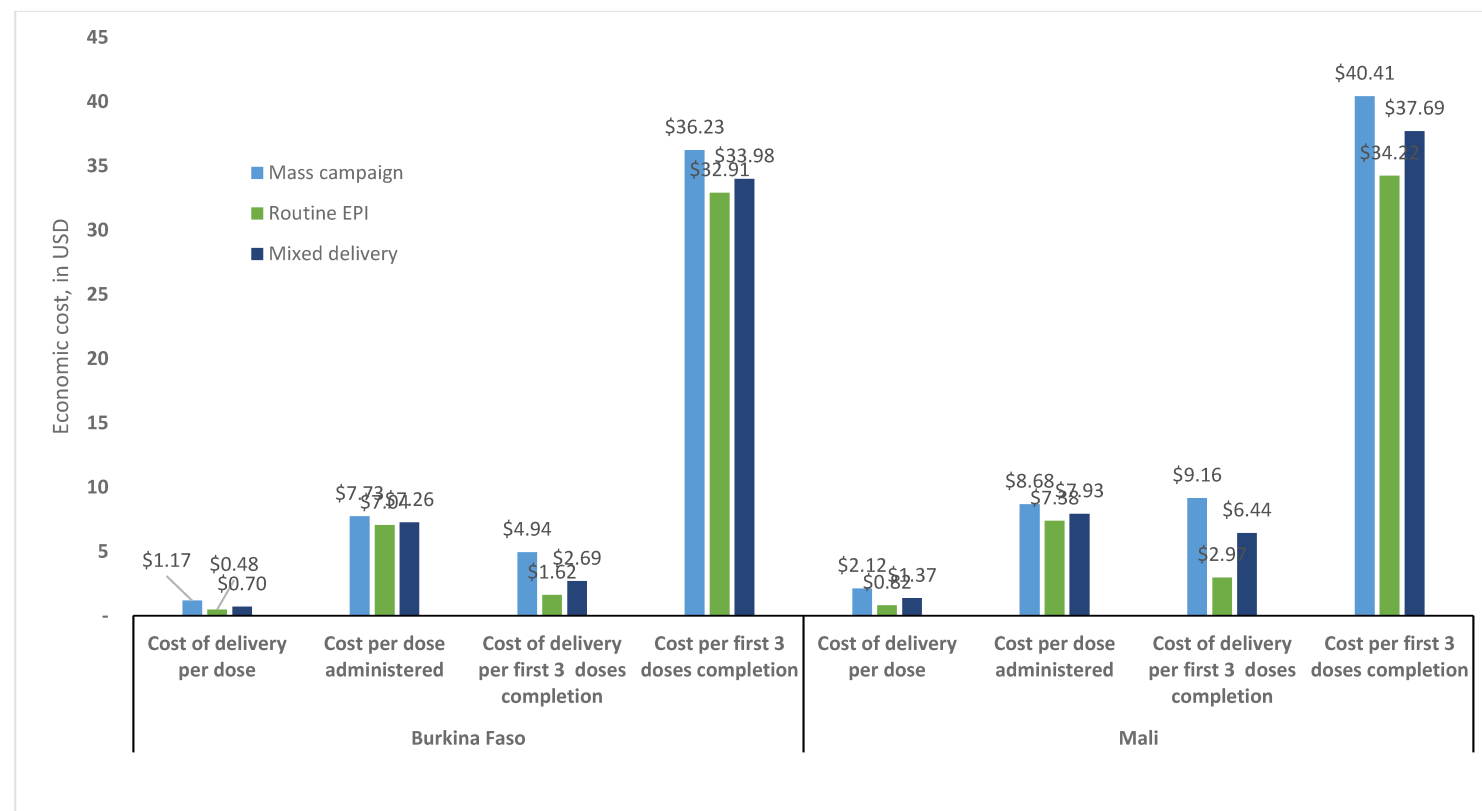

Appendix Figure 2.a: Cost drivers across different scenarios of vaccine delivery, Burkina Faso

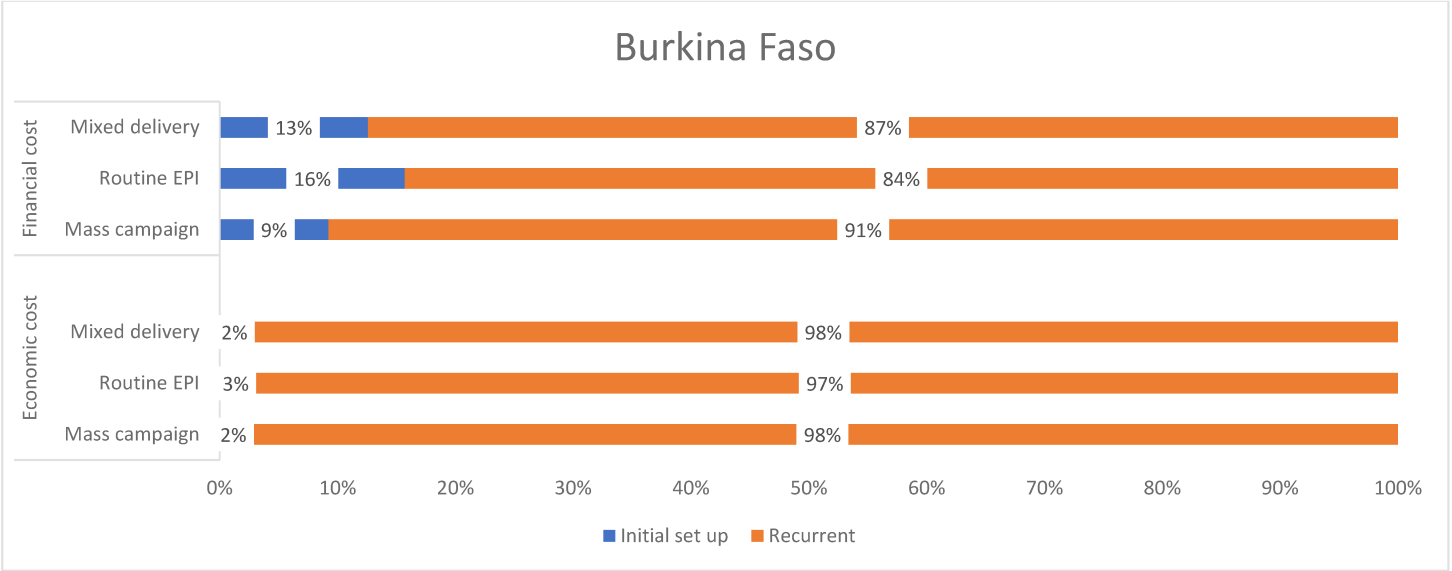

Appendix Figure 2.b: Cost drivers across different scenarios of vaccine delivery, Mali

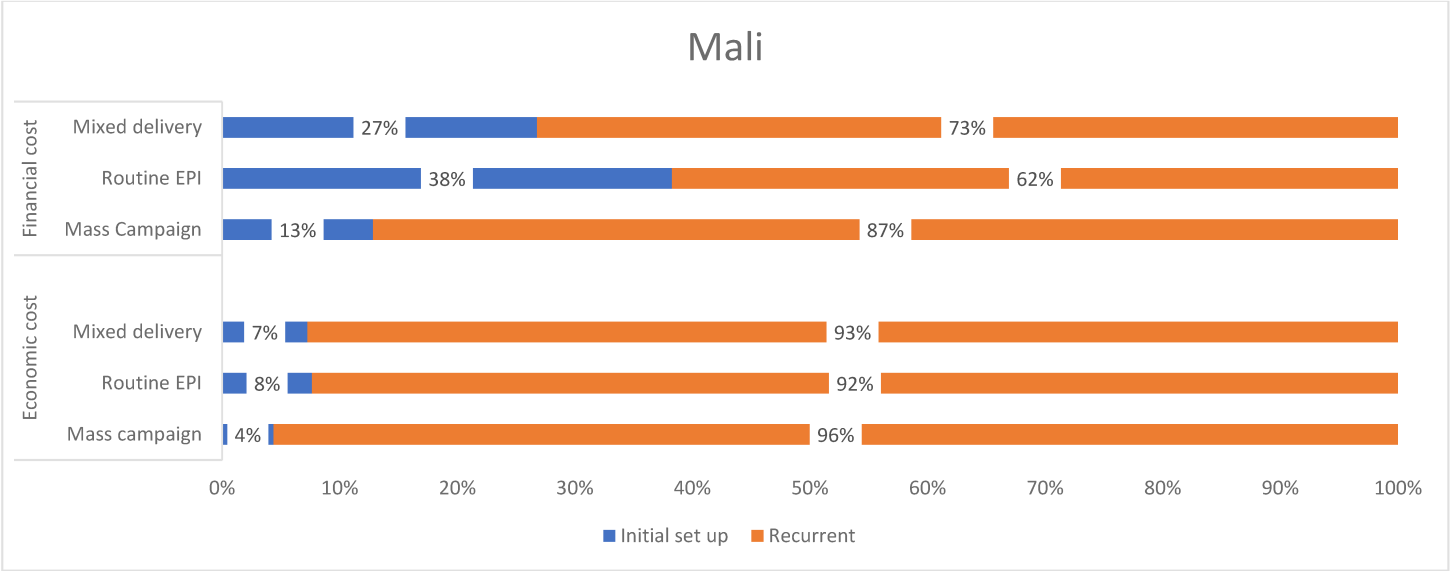

Supplement: bmjgh-2022-011316supp001_data_supplement.pdf [file bmjgh-2022-011316supp001_data_supplement.pdf]
